# Supplementary material
Source: PubMed Central journal article supplement (PMC3342813)

## **Supporting Information:**

### **Divergence of Structure and Function in the Haloacid Dehalogenase Enzyme Superfamily:**

#### ***Bacteroides Thetaiotaomicron* BT2127 is an Inorganic Pyrophosphatase<sup>+</sup>**

Hua Huang<sup>1</sup>, Yury Patskovsky<sup>2</sup>, Rafael Toro<sup>2</sup>, Jeremiah D. Farelli<sup>3</sup>, Chetanya Pandya<sup>4</sup>, Steve Almo<sup>2\*</sup>, Karen N. Allen<sup>3\*</sup>, and Debra Dunaway-Mariano<sup>1\*</sup>

<sup>1</sup>*Department of Chemistry and Chemical Biology, University of New Mexico, Albuquerque, New Mexico 87131;* <sup>2</sup> *Department of Biochemistry, Albert Einstein College of Medicine, Jack and Pearl Resnick Campus, 1300 Morris Park Avenue, Bronx, NY 10461;* <sup>3</sup>*Department of Chemistry, Boston University 590 Commonwealth Avenue, Boston, MA 02215-2521,* <sup>4</sup>*Bioinformatics Graduate Program, Boston University, 24 Cummington Street Boston, MA 02215-2521*

\*To whom correspondence should be addressed regarding X-ray structure determination (S.A. or K.N.A.) or kinetic analyses (D.D.-M.)

**Contents:** 20 pages total, which contain Tables S1-S8 and Figures S1-S9.

**Table S1.** Crystallization conditions used for wild-type and mutant BT2127.

| BT2127 | PDB code | Ligand                                                                                  | Crystallization conditions                                                                                     |
|--------|----------|-----------------------------------------------------------------------------------------|----------------------------------------------------------------------------------------------------------------|
| WT     | 3QU2     | citrate, Cl <sup>-</sup> , glycerol, Mg <sup>2+</sup>                                   | 0.1 M sodium citrate, pH 5.6, 30% PEG4000, 0.2 M ammonium acetate, 5 mM, MgCl <sub>2</sub> , 294 K             |
| WT     | 3QXG     | acetate, Ca <sup>2+</sup> , Mg <sup>2+</sup> , PO <sub>4</sub> <sup>2-</sup> , tartrate | 0.1 M sodium acetate, 0.2 M calcium acetate, 30% PEG400, 5 mM MgCl <sub>2</sub> , 294 K                        |
| WT     | 3QUQ     | Cl <sup>-</sup> , formate, Mg <sup>2+</sup> , unknown                                   | 0.1 M Bis-Tris, pH 6.5, 25% PEG3350, 0.2 M MgCl <sub>2</sub> , 294 K                                           |
| WT     | 3QX7     | Mg <sup>2+</sup> , PO <sub>4</sub> <sup>2-</sup>                                        | 0.056 M sodium phosphate monobasic, pH 8.2, 1.34 M potassium phosphate dibasic, 5 mM MgCl <sub>2</sub> , 294 K |
| D11N   | 3QU5     | Cl <sup>-</sup>                                                                         | 0.1 M Bis-Tris, pH 6.5, 25% PEG3350, 0.2 M MgCl <sub>2</sub> , 294 K                                           |
| D13A   | 3QU4     | Acetate, Cl <sup>-</sup> , Mg <sup>2+</sup>                                             | 0.1 M MES, pH 6.0, 20% PEG8000, 0.2 M calcium acetate, 5 mM MgCl <sub>2</sub> , 291 K                          |
| D13N   | 3QU9     | Cl <sup>-</sup> , glycerol, Mg <sup>2+</sup> , tartrate                                 | 0.1 M potassium sodium tartrate, pH 8.0, 0.1 M imidazole, 0.2 M NaCl, 5 mM MgCl <sub>2</sub> , 294 K           |
| D13N   | 3QU7     | Acetate, Ca <sup>2+</sup> , PO <sub>4</sub> <sup>2-</sup>                               | 0.1 M sodium acetate, pH 4.5, 30% PEG400, 0.2 M calcium acetate, 5 mM MgCl <sub>2</sub> , 294 K                |
| D13N   | 3QUT     | Cl <sup>-</sup> , Mg <sup>2+</sup> , malate                                             | 0.15 M Malic acid, pH 7, 20% PEG3350, 5 mM MgCl <sub>2</sub> , 294 K                                           |
| E47D   | 3R9K     | SO <sub>4</sub> <sup>2-</sup>                                                           | 0.1 M Tris-HCl, pH 8.5, 30% PEG4000, 0.2 M LiSO <sub>4</sub> , 5 mM MgCl <sub>2</sub> , 294 K                  |
| E47N   | 3QYP     | Ca <sup>2+</sup> , Cl <sup>-</sup> , glycerol, PO <sub>4</sub> <sup>2-</sup> , unknown  | 0.1 M MES, pH 6.0, 20% PEG8000, 0.2 M calcium acetate, 5 mM MgCl <sub>2</sub> , 294 K                          |
| E47N   | 3QUC     | SO <sub>4</sub> <sup>2-</sup>                                                           | 0.1 M Tris-HCl, pH 8.5, 30% PEG4000, 0.2 M LiSO <sub>4</sub> , 5 mM MgCl <sub>2</sub> , 294 K                  |
| E47A   | 3QUB     | SO <sub>4</sub> <sup>2-</sup>                                                           | 0.1 M Tris-HCl, pH 8.5, 30% PEG4000, 0.2 M LiSO <sub>4</sub> , 5 mM MgCl <sub>2</sub> , 294 K                  |

Table S2. Data collection and refinement statistics for wild-type BT2127. Numbers in parenthesis are those for the high resolution shell.

| PDB ID                                 | 3QUQ                                                  | 3QU2                                                  | 3QX7                                             | 3QXG                                                                                    |
|----------------------------------------|-------------------------------------------------------|-------------------------------------------------------|--------------------------------------------------|-----------------------------------------------------------------------------------------|
| Cap orientation                        | Opened                                                | Closed                                                | Closed                                           | Closed                                                                                  |
| Space group                            | P212121                                               | C2                                                    | P3121                                            | C2                                                                                      |
| Unit cell dimensions (Å)               | -                                                     | -                                                     | -                                                | -                                                                                       |
| -a                                     | 45.20                                                 | 137.60                                                | 84.58                                            | 114.07                                                                                  |
| -b                                     | 65.34                                                 | 71.76                                                 | 84.58                                            | 70.59                                                                                   |
| -c                                     | 75.62                                                 | 114.53                                                | 79.27                                            | 76.32                                                                                   |
| Cell angles (degrees)                  | -                                                     | -                                                     | -                                                | -                                                                                       |
| -alpha                                 | 90.00                                                 | 90.00                                                 | 90.00                                            | 90.00                                                                                   |
| -beta                                  | 90.00                                                 | 105.80                                                | 90.00                                            | 119.77                                                                                  |
| -gamma                                 | 90.00                                                 | 90.00                                                 | 120.00                                           | 90.00                                                                                   |
| Molecules per asymmetric unit          | 1                                                     | 4                                                     | 1                                                | 2                                                                                       |
| Solvent content                        | 38.42                                                 | 51.25                                                 | 61.05                                            | 50.18                                                                                   |
| Matthew's Coefficient                  | 2.00                                                  | 2.52                                                  | 3.16                                             | 2.47                                                                                    |
| Ligands                                | Cl <sup>-</sup> , formate, Mg <sup>2+</sup> , unknown | Citrate, Cl <sup>-</sup> , glycerol, Mg <sup>2+</sup> | Mg <sup>2+</sup> , PO <sub>4</sub> <sup>2-</sup> | Acetate, Ca <sup>2+</sup> , Mg <sup>2+</sup> , PO <sub>4</sub> <sup>2-</sup> , tartrate |
| X-ray source                           | NSLS X29A                                             | NSLS X29A                                             | NSLS X29A                                        | NSLS X29A                                                                               |
| Wavelength                             | 1.0750                                                | 1.0809                                                | 0.9791                                           | 0.9791                                                                                  |
| Resolution                             | 49.45-1.65                                            | 40.00-1.94                                            | 20.00-2.00                                       | 50.00-1.24                                                                              |
| Reflections                            | 28,023                                                | 79,445                                                | 22,599                                           | 147,352                                                                                 |
| Completeness (%)                       | 99.2 (92.1)                                           | 99.3 (93.1)                                           | 95.00                                            | 99.0 (86.0)                                                                             |
| I/sigma (I)                            | 6.10 (3.00)                                           | 3.40 (1.20)                                           | 7.40 (1.00)                                      | 7.40 (0.90)                                                                             |
| R <sub>sym</sub>                       | 0.092 (0.530)                                         | 0.124 (0.800)                                         | 0.078 (0.900)                                    | 0.056 (0.920)                                                                           |
| R <sub>work</sub> (R <sub>free</sub> ) | 16.4 (17.8)                                           | 23.4 (27.5)                                           | 19.1 (24.3)                                      | 15.2 (18.2)                                                                             |
| R <sub>free</sub> reflections (%)      | 683 (3.2%)                                            | 2349 (3.0%)                                           | 683 (3.2%)                                       | 4418 (3.0%)                                                                             |
| Average B factor (overall)             | 23.69                                                 | 20.31                                                 | 58.11                                            | 22.23                                                                                   |
| -amino acid residues                   | 22.54                                                 | 19.78                                                 | 58.15                                            | 20.26                                                                                   |
| -waters                                | 33.12                                                 | 25.21                                                 | 56.95                                            | 35.98                                                                                   |
| -ligands                               | 26.74, 13.70, 47.62, 13.19                            | 43.90, 32.70, 32.49, 13.95                            | 51.78, 58.89                                     | 19.22, 18.43, 24.61, 21.26, 21.78                                                       |
| Root-mean square deviation             | -                                                     | -                                                     | -                                                | -                                                                                       |
| -bond lengths                          | 0.011                                                 | 0.010                                                 | 0.011                                            | 0.012                                                                                   |
| -bond angles                           | 1.293                                                 | 1.273                                                 | 1.293                                            | 1.411                                                                                   |
| Ramachandran favored/allowed (%)       | 99.1 (0.9)                                            | 99.1 (0.9)                                            | 98.7 (1.3)                                       | 98.8 (1.2)                                                                              |
| Number of solvent molecules            | 98                                                    | 649                                                   | 98                                               | 525                                                                                     |

**Table S3.** Data collection and refinement statistics for BT2127 D11N. Numbers in parenthesis are those for the high resolution shell

| PDB ID                                 | 3QU5            |
|----------------------------------------|-----------------|
| Mutation                               | D11N            |
| Cap orientation                        | Closed          |
| Space group                            | P21             |
| Unit cell dimensions (Å)               | -               |
| -a                                     | 42.80           |
| -b                                     | 77.21           |
| -c                                     | 70.76           |
| Cell angles (degrees)                  | -               |
| -alpha                                 | 90.00           |
| -beta                                  | 90.41           |
| -gamma                                 | 90.00           |
| Molecules per asymmetric unit          | 2               |
| Solvent content                        | 45.44           |
| Matthew's Coefficient                  | 2.25            |
| Ligands                                | Cl <sup>-</sup> |
| X-ray source                           | NLSL X29A       |
| Wavelength                             | 0.9786          |
| Resolution                             | 40.00-1.24      |
| Reflections                            | 129,987         |
| Completeness (%)                       | 96.3 (68.4)     |
| I/sigma (I)                            | 8.00 (1.40)     |
| R <sub>sym</sub>                       | 0.043 (0.550)   |
| R <sub>work</sub> (R <sub>free</sub> ) | 13.0 (16.0)     |
| R <sub>free</sub> reflections (%)      | 3775 (3.0%)     |
| Average B factor (overall)             | 22.35           |
| -amino acid residues                   | 19.62           |
| -waters                                | 35.36           |
| -ligands                               | 23.42           |
| Root-mean square deviation             | -               |
| -bond lengths                          | 0.011           |
| -bond angles                           | 1.407           |
| Ramachandran favored/allowed (%)       | 99.4 (0.6)      |
| Number of solvent molecules            | 764             |

**Table S4.** Data collection and refinement statistics for BT2127 D13. Numbers in parenthesis are those for the high resolution shell

| PDB ID                                 | 3QU4                                           | 3QUT                                           | 3QU7                                                         | 3QU9                                                       |
|----------------------------------------|------------------------------------------------|------------------------------------------------|--------------------------------------------------------------|------------------------------------------------------------|
| Mutation                               | D13A                                           | D13N                                           | D13N                                                         | D13N                                                       |
| Cap orientation                        | Closed                                         | Opened                                         | Closed                                                       | Closed                                                     |
| Space group                            | P1                                             | P212121                                        | C2221                                                        | P3121                                                      |
| Unit cell dimensions (Å)               | -                                              | -                                              | -                                                            | -                                                          |
| -a                                     | 69.94                                          | 45.47                                          | 72.55                                                        | 84.17                                                      |
| -b                                     | 76.22                                          | 65.40                                          | 136.87                                                       | 84.17                                                      |
| -c                                     | 95.59                                          | 76.17                                          | 114.83                                                       | 79.36                                                      |
| Cell angles (degrees)                  | -                                              | -                                              | -                                                            | -                                                          |
| -alpha                                 | 89.97                                          | 90.00                                          | 90.00                                                        | 90.00                                                      |
| -beta                                  | 89.97                                          | 90.00                                          | 90.00                                                        | 90.00                                                      |
| -gamma                                 | 90.00                                          | 90.00                                          | 90.00                                                        | 120.00                                                     |
| Molecules per asymmetric unit          | 8                                              | 1                                              | 2                                                            | 1                                                          |
| Solvent content                        | 47.95                                          | 38.42                                          | 53.48                                                        | 59.60                                                      |
| Matthew's Coefficient                  | 2.36                                           | 2.00                                           | 2.64                                                         | 3.04                                                       |
| Ligands                                | Acetate, Cl <sup>-</sup> ,<br>Mg <sup>2+</sup> | Cl <sup>-</sup> , Mg <sup>2+</sup> ,<br>malate | Acetate, Ca <sup>2+</sup> ,<br>PO <sub>4</sub> <sup>2-</sup> | Cl <sup>-</sup> , glycerol,<br>Mg <sup>2+</sup> , tartrate |
| X-ray source                           | Rotating<br>Anode/Rigaku                       | NSLS X29A                                      | NSLS X29A                                                    | NSLS X29A                                                  |
| Wavelength                             | 1.5418                                         | 0.9791                                         | 0.9792                                                       | 1.0750                                                     |
| Resolution                             | 50.00-2.00                                     | 50.00-1.50                                     | 50.00-1.90                                                   | 40.00-1.87                                                 |
| Reflections                            | 133,986                                        | 37,187                                         | 45,325                                                       | 27,292                                                     |
| Completeness (%)                       | 93.2 (83.9)                                    | 100.0 (100.0)                                  | 99.8 (99.5)                                                  | 99.1 (92.8)                                                |
| I/sigma (I)                            | 4.50 (0.60)                                    | 7.40 (3.00)                                    | 7.70 (2.00)                                                  | 8.10 (1.00)                                                |
| R <sub>sym</sub>                       | 0.101 (0.730)                                  | 0.067 (0.600)                                  | 0.053 (0.680)                                                | 0.069 (0.820)                                              |
| R <sub>work</sub> (R <sub>free</sub> ) | 21.8 (28.6)                                    | 14.5 (17.2)                                    | 19.0 (22.6)                                                  | 20.9 (25.2)                                                |
| R <sub>free</sub> reflections (%)      | 3211 (3.0%)                                    | 1152 (3.1%)                                    | 1408 (3.1%)                                                  | 826 (3.2%)                                                 |
| Average B factor (overall)             | 36.17                                          | 25.13                                          | 47.74                                                        | 51.00                                                      |
| -amino acid residues                   | 36.24                                          | 23.78                                          | 47.63                                                        | 50.92                                                      |
| -waters                                | 35.32                                          | 35.55                                          | 49.74                                                        | 52.02                                                      |
| -ligands                               | 42.94, 32.50,<br>9.15                          | 27.87, 14.21,<br>16.22                         | 38.21, 37.62,<br>37.76                                       | 52.69, 80.66,<br>39.26, 40.96                              |
| Root-mean square deviation             | -                                              | -                                              | -                                                            | -                                                          |
| -bond lengths                          | 0.009                                          | 0.011                                          | 0.009                                                        | 0.011                                                      |
| -bond angles                           | 1.177                                          | 1.387                                          | 1.202                                                        | 1.352                                                      |
| Ramachandran favored/allowed (%)       | 98.3 (1.7)                                     | 98.7 (1.3)                                     | 98.7 (1.3)                                                   | 97.0 (3.0)                                                 |
| Number of solvent molecules            | 982                                            | 243                                            | 275                                                          | 110                                                        |

**Table S5.** Data collection and refinement statistics for BT2127 E47.

| PDB ID                                 | 3QUB                          | 3R9K                          | 3QUC                          | 3QYP                                                                                         |
|----------------------------------------|-------------------------------|-------------------------------|-------------------------------|----------------------------------------------------------------------------------------------|
| Mutation                               | E47A                          | E47D                          | E47N                          | E47N                                                                                         |
| Cap orientation                        | Closed                        | Closed                        | Closed                        | Closed                                                                                       |
| Space group                            | P3121                         | P3121                         | P3121                         | P21                                                                                          |
| Unit cell dimensions (Å)               | -                             | -                             | -                             | -                                                                                            |
| -a                                     | 85.38                         | 84.60                         | 84.72                         | 42.94                                                                                        |
| -b                                     | 85.38                         | 84.60                         | 84.72                         | 77.18                                                                                        |
| -c                                     | 78.92                         | 79.24                         | 79.21                         | 70.80                                                                                        |
| Cell angles (degrees)                  | -                             | -                             | -                             | -                                                                                            |
| -alpha                                 | 90.00                         | 90.00                         | 90.00                         | 90.00                                                                                        |
| -beta                                  | 90.00                         | 90.00                         | 90.00                         | 90.21                                                                                        |
| -gamma                                 | 120.00                        | 120.00                        | 120.00                        | 90.00                                                                                        |
| Molecules per asymmetric unit          | 1                             | 1                             | 1                             | 2                                                                                            |
| Solvent content                        | 59.60                         | 59.60                         | 59.60                         | 43.50                                                                                        |
| Matthew's Coefficient                  | 3.04                          | 3.04                          | 3.04                          | 2.17                                                                                         |
| Ligands                                | SO <sub>4</sub> <sup>2-</sup> | SO <sub>4</sub> <sup>2-</sup> | SO <sub>4</sub> <sup>2-</sup> | Ca <sup>2+</sup> , Cl <sup>-</sup> ,<br>glycerol, PO <sub>4</sub> <sup>2-</sup> ,<br>unknown |
| X-ray source                           | NSLS X29A                     | NSLS X29A                     | NSLS X29A                     | NSLS X29A                                                                                    |
| Wavelength                             | 1.0750                        | 1.0750                        | 1.0750                        | 0.9792                                                                                       |
| Resolution                             | 40.00-1.90                    | 50.00-1.80                    | 50.00-1.87                    | 50.00-1.60                                                                                   |
| Reflections                            | 27,369                        | 30,588                        | 27,575                        | 61,148                                                                                       |
| Completeness (%)                       | 99.1 (99.6)                   | 99.7 (100.0)                  | 97.2 (95.3)                   | 95.3 (69.0)                                                                                  |
| I/sigma (I)                            | 4.60 (1.00)                   | 8.50 (1.20)                   | 4.30 (1.20)                   | 9.50 (1.00)                                                                                  |
| R <sub>sym</sub>                       | 0.137 (0.770)                 | 0.071 (0.800)                 | 0.076 (.760)                  | 0.065 (0.800)                                                                                |
| R <sub>work</sub> (R <sub>free</sub> ) | 19.8 (24.3)                   | 19.0 (22.7)                   | 21.6 (28.3)                   | 18.5 (21.7)                                                                                  |
| R <sub>free</sub> reflections (%)      | 846 (3.2%)                    | 966 (3.2%)                    | 703 (3.2%)                    | 1776 (3.1%)                                                                                  |
| Average B factor (overall)             | 43.06                         | 44.14                         | 57.09                         | 29.12                                                                                        |
| -amino acid residues                   | 42.58                         | 43.57                         | 57.04                         | 28.16                                                                                        |
| -waters                                | 47.80                         | 49.74                         | 58.06                         | 36.31                                                                                        |
| -ligands                               | 32.25                         | 38.55                         | 58.69                         | 23.05, 48.68,<br>56.89, 23.89,<br>41.27                                                      |
| Root-mean square deviation             | -                             | -                             | -                             | -                                                                                            |
| -bond lengths                          | 0.010                         | 0.011                         | 0.010                         | 0.012                                                                                        |
| -bond angles                           | 1.253                         | 1.225                         | 1.256                         | 1.343                                                                                        |
| Ramachandran favored/allowed (%)       | 99.1 (0.9)                    | 98.3 (1.7)                    | 98.7 (1.3)                    | 99.6 (0.4)                                                                                   |
| Number of solvent molecules            | 191                           | 192                           | 127                           | 467                                                                                          |

**Table S6.** The apparent first order rate constants for BT2127 catalyzed hydrolysis of phosphate esters and anhydrides at pH 7.5 and 25 °C. Reaction solutions initially contained 0.3 mM substrate, 8.4  $\mu$ M BT2127, 1 mM MgCl<sub>2</sub>, 1.0 unit/mL purine nucleoside phosphorylase and 0.2 mM MESG in 50 mM Tris (pH 7.5). The  $k_{obs}$  value was calculated by dividing the initial velocity of the reaction by the enzyme concentration.

| <b>Substrate</b>             | <b><math>k_{obs}</math> (min<sup>-1</sup>)</b> | <b>Substrate</b>            | <b><math>k_{obs}</math> (min<sup>-1</sup>)</b> |
|------------------------------|------------------------------------------------|-----------------------------|------------------------------------------------|
| Pyrophosphate                | 19                                             | $\beta$ -fucose-1-phosphate | 0.10                                           |
| Imidodiphosphate             | 0.06                                           | GMP                         | 0.38                                           |
| Glyceraldehyde 3-phosphate   | 0.17                                           | UDP                         | 0.17                                           |
| Glycerate-3-phosphate        | 0.31                                           | ATP                         | 0.20                                           |
| D-erythrose-4-phosphate      | 0.20                                           | dATP                        | 0.18                                           |
| Dihydroxyacetone phosphate   | 0.30                                           | Farnesylpyrophosphate       | 0.059                                          |
| Glycerol-2-phosphate         | 0.49                                           | PLP                         | NA <sup>a</sup>                                |
| Glucose-1-phosphate          | 0.12                                           | CTP                         | NA <sup>a</sup>                                |
| Glucose-6-phosphate          | 0.19                                           | Serine-3-phosphate          | NA <sup>a</sup>                                |
| Fructose-6-phosphate         | 0.32                                           | Threonine phosphate         | NA <sup>a</sup>                                |
| $\alpha$ -fucose-6-phosphate | 0.21                                           |                             |                                                |

<sup>a</sup> NA represents no detectable activity.

**Table S7.** The apparent first order rate ( $k_{\text{obs}}$  ( $\text{min}^{-1}$ )) constants for BT2127 catalyzed hydrolysis of phosphate esters and anhydrides at pH 7.5 and 25 °C. Reaction solutions initially contained 300  $\mu\text{M}$  substrate, 8.4  $\mu\text{M}$  mutant BT2127, 1 mM  $\text{MgCl}_2$ , 1.0 unit/mL purine nucleoside phosphorylase and 0.2 mM MESG in 50 mM Tris (pH 7.5). The  $k_{\text{obs}}$  value was calculated by dividing the initial velocity of the reaction by the enzyme concentration.

| Substrate              | wild-type             | E47A                  | E47N                 | M20A                  | M20L                 | M20K                 |
|------------------------|-----------------------|-----------------------|----------------------|-----------------------|----------------------|----------------------|
| pyrophosphate          | $1.9 \times 10^1$     | $4.7 \times 10^{-4}$  | $5.5 \times 10^{-4}$ | $8.4 \times 10^{-4}$  | $3.1 \times 10^{-3}$ | $6.5 \times 10^{-3}$ |
| D-ribose-5-P           | $2.0 \times 10^{-1}$  | $2.5 \times 10^{-4}$  | $7.3 \times 10^{-4}$ | $1.3 \times 10^{-3}$  | $2.1 \times 10^{-3}$ | $2.3 \times 10^{-4}$ |
| glycerol-1-P           | $3.5 \times 10^{-1}$  | $4.4 \times 10^{-4}$  | $4.6 \times 10^{-4}$ | $4.8 \times 10^{-3}$  | $4.2 \times 10^{-3}$ | $4.0 \times 10^{-3}$ |
| P-nitrophenylphosphate | $5.8 \times 10^{-3}$  | $4.2 \times 10^{-4}$  | $3.8 \times 10^{-4}$ | $2.1 \times 10^{-5}$  | $2.6 \times 10^{-3}$ | $4.6 \times 10^{-3}$ |
| fructose-6-P           | $5.3 \times 10^{-3}$  | $2.5 \times 10^{-4}$  | $9.5 \times 10^{-5}$ | $4.4 \times 10^{-4}$  | $1.6 \times 10^{-3}$ | $3.6 \times 10^{-4}$ |
| UMP                    | $1.5 \times 10^{-1}$  | $2.16 \times 10^{-4}$ | $2.6 \times 10^{-4}$ | $3.16 \times 10^{-4}$ | $1.6 \times 10^{-3}$ | $3.7 \times 10^{-3}$ |
| imidodiphosphate       | $1.03 \times 10^{-3}$ | $6.2 \times 10^{-5}$  | $2.2 \times 10^{-4}$ | $6.0 \times 10^{-3}$  | $3.1 \times 10^{-3}$ | $4.4 \times 10^{-3}$ |
| glucose-1-P            | $2.0 \times 10^{-3}$  | $1.1 \times 10^{-4}$  | $9.5 \times 10^{-5}$ | $8.4 \times 10^{-4}$  | $1.3 \times 10^{-3}$ | $2.9 \times 10^{-3}$ |
| glucose-6-P            | $3.2 \times 10^{-3}$  | $1.9 \times 10^{-4}$  | $2.9 \times 10^{-4}$ | $2.8 \times 10^{-4}$  | $6.2 \times 10^{-4}$ | $3.7 \times 10^{-3}$ |
| $\beta$ -glucose-1,6-P | $4.1 \times 10^{-3}$  | $3.0 \times 10^{-5}$  | $2.8 \times 10^{-5}$ | $6.3 \times 10^{-4}$  | $6.7 \times 10^{-4}$ | $1.5 \times 10^{-4}$ |
| $\alpha$ -fucose 1-P   | $3.5 \times 10^{-3}$  | $2.3 \times 10^{-4}$  | $9.2 \times 10^{-4}$ | $2.5 \times 10^{-4}$  | $2.1 \times 10^{-3}$ | $1.6 \times 10^{-3}$ |
| $\beta$ -fucose 1-P    | $1.7 \times 10^{-3}$  | $5.5 \times 10^{-4}$  | $3.2 \times 10^{-4}$ | $2.3 \times 10^{-4}$  | $1.9 \times 10^{-3}$ | $9.1 \times 10^{-4}$ |
| glycerol-2-P           | $8.16 \times 10^{-3}$ | $2.1 \times 10^{-4}$  | $2.7 \times 10^{-4}$ | $1.6 \times 10^{-4}$  | $1.6 \times 10^{-3}$ | $3.7 \times 10^{-3}$ |
| serine-3-P             | $3.3 \times 10^{-6}$  | $1.4 \times 10^{-4}$  | $4.1 \times 10^{-4}$ | $3.5 \times 10^{-4}$  | $1.0 \times 10^{-3}$ | $3.5 \times 10^{-3}$ |



**Table S8.** Structures of HADSF proteins that have cap domains similar to that of BT2127.

| <b><u>PDB</u></b> | <b><u>Z-score</u></b> | <b><u>Organism</u></b>     | <b><u>Name</u></b>                       |
|-------------------|-----------------------|----------------------------|------------------------------------------|
| 3DV9              | 14.7                  | Bacteriodes vulgatis       | putative BPGM                            |
| 3NAS              | 10.6                  | Bacillus subtilis          | putative BPGM                            |
| 1LVH              | 10.2                  | Lactococcus lactis         | BPGM                                     |
| 3D6J              | 10.2                  | Bacteriodes fragilis       | putative HAD member                      |
| 2HSZ              | 9.5                   | Haemophilus somnus         | predicted phosphatase                    |
| 2HDO              | 9.2                   | Lactobacillus plantarum    | putative phosphoglycolate phosphatase    |
| 3MC1              | 8.8                   | Clostridium acetobutylicum | predicted phosphatase                    |
| 2AH5              | 8.7                   | Streptococcus pneumoniae   | putative HAD member                      |
| 2GO7              | 8.3                   | Streptococcus pneumoniae   | putative HAD member                      |
| 1RDF              | 7.8                   | Bacillus cereus            | phosphonoacetaldehyde hydrolase          |
| 3KBB              | 7.4                   | Thermotoga maritima        | putative BPGM                            |
| 2FI1              | 7.4                   | Streptococcus pneumoniae   | putative hydrolase                       |
| 2HI0              | 7.4                   | Lactobacillus delbrueckii  | putative phosphoglycolate phosphatase    |
| 1TE2              | 7.3                   | Escherichia coli K12       | putative phosphatase Ynic                |
| 2HCF              | 7.3                   | Chlorobium tepidum         | putative HAD member                      |
| 3L5K              | 6.8                   | Homo sapiens               | putative HAD member                      |
| 2NYV              | 6.2                   | Aquifex aeolicus           | putative phosphoglycolate phosphatase    |
| 2HOQ              | 5.1                   | Pyrococcus Horikoshii      | putative HAD member                      |
| 3E58-             | 5                     | Streptococcus thermophilus | putative BPGM                            |
| 2FDR              | 4.5                   | Agrobacterium tumefaciens  | putative HAD member                      |
| 3ED5              | 4.5                   | Bacillus subtilis          | putative HAD member                      |
| 3IRU              | 4                     | Oleispira antarctica       | putative phosphonoacetaldehyde hydrolase |

**Figure S1.** Commassie blue stained SDS-PAGE gel of purified BT2127 (Q8A5V9).

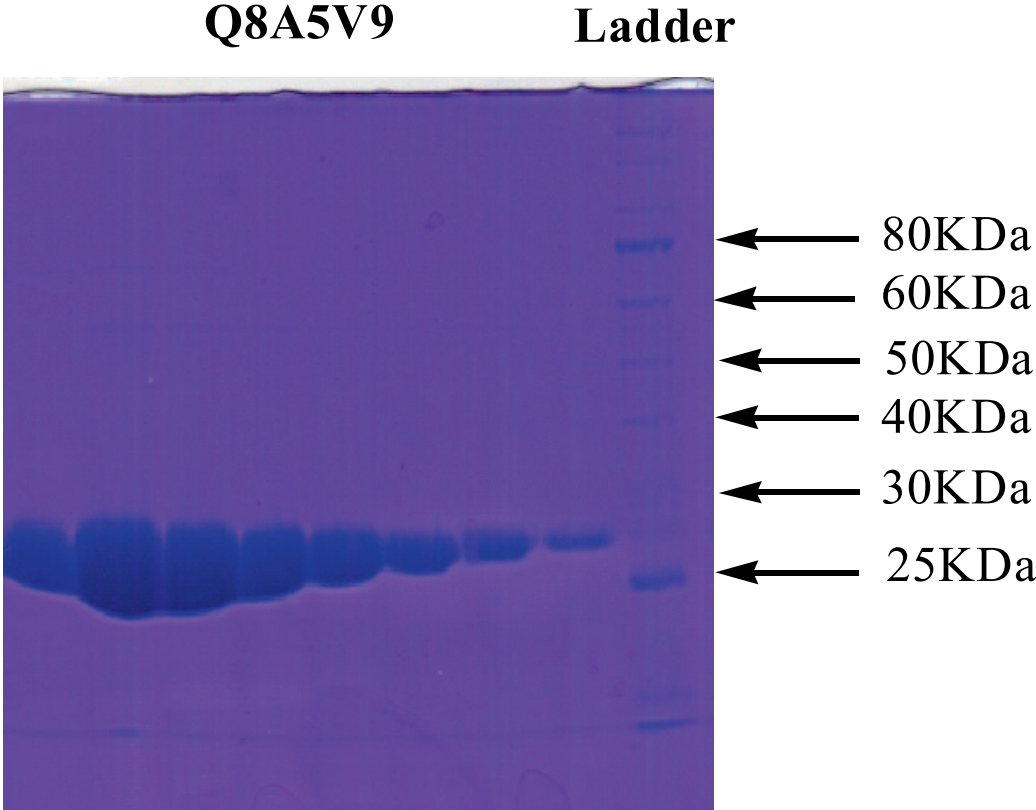

**Figure S2.** The pH-rate profiles measured for BT2127 catalyzed hydrolysis of pyrophosphate. (See Materials and Methods for details).

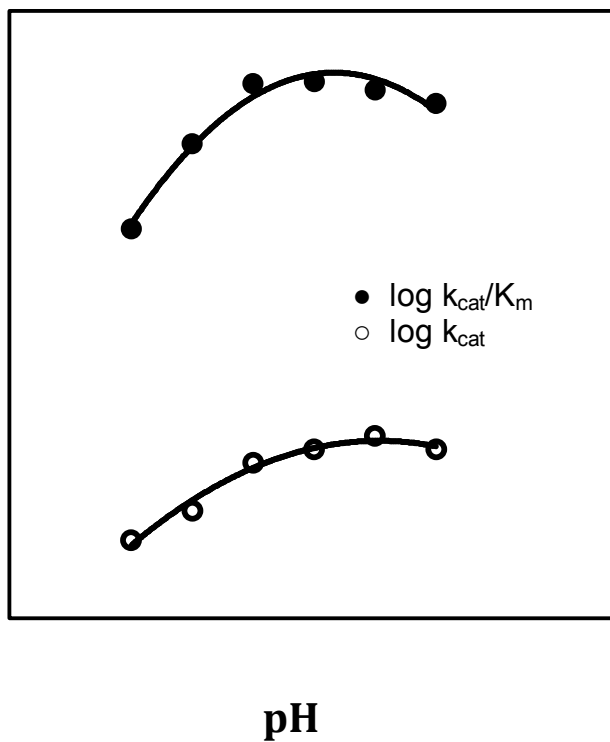

**Figure S3.** Double reciprocal plot of the initial velocities BT2127 catalyzed hydrolysis of inorganic pyrophosphate at varying concentration (3, 5, 8, 10, 15, 20  $\mu\text{M}$ ) measured as a function of imidodiphosphate concentration (0  $\mu\text{M}$ , 10  $\mu\text{M}$ , 35  $\mu\text{M}$ , 50  $\mu\text{M}$ ). Reaction solutions contained 1 mM  $\text{MgCl}_2$ , 0.2 mM MESG and 1.0 unit/mL purine nucleoside phosphorylase in 50 mM Tris (pH 7.5; 25  $^\circ\text{C}$ ). Data were fitted to equation 2.

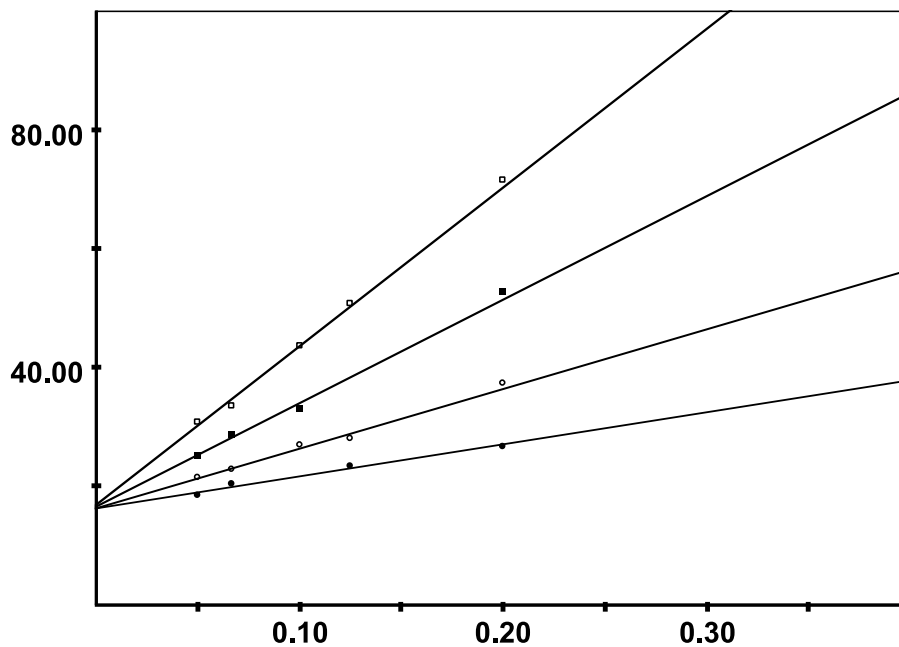

Figure S4. (Top) Superposition of BT2127 (gray ribbon) bound to phosphate and  $Mg^{2+}$  (magenta sphere) (PDB ID 3QX7) and  $\beta$ -PGM (cyan ribbon) bound to  $Mg^{2+}$  and  $\beta$ -glucose 1,6-(bis)phosphate (PDB ID 1O08). (Bottom) The active site of the overlaid structures.

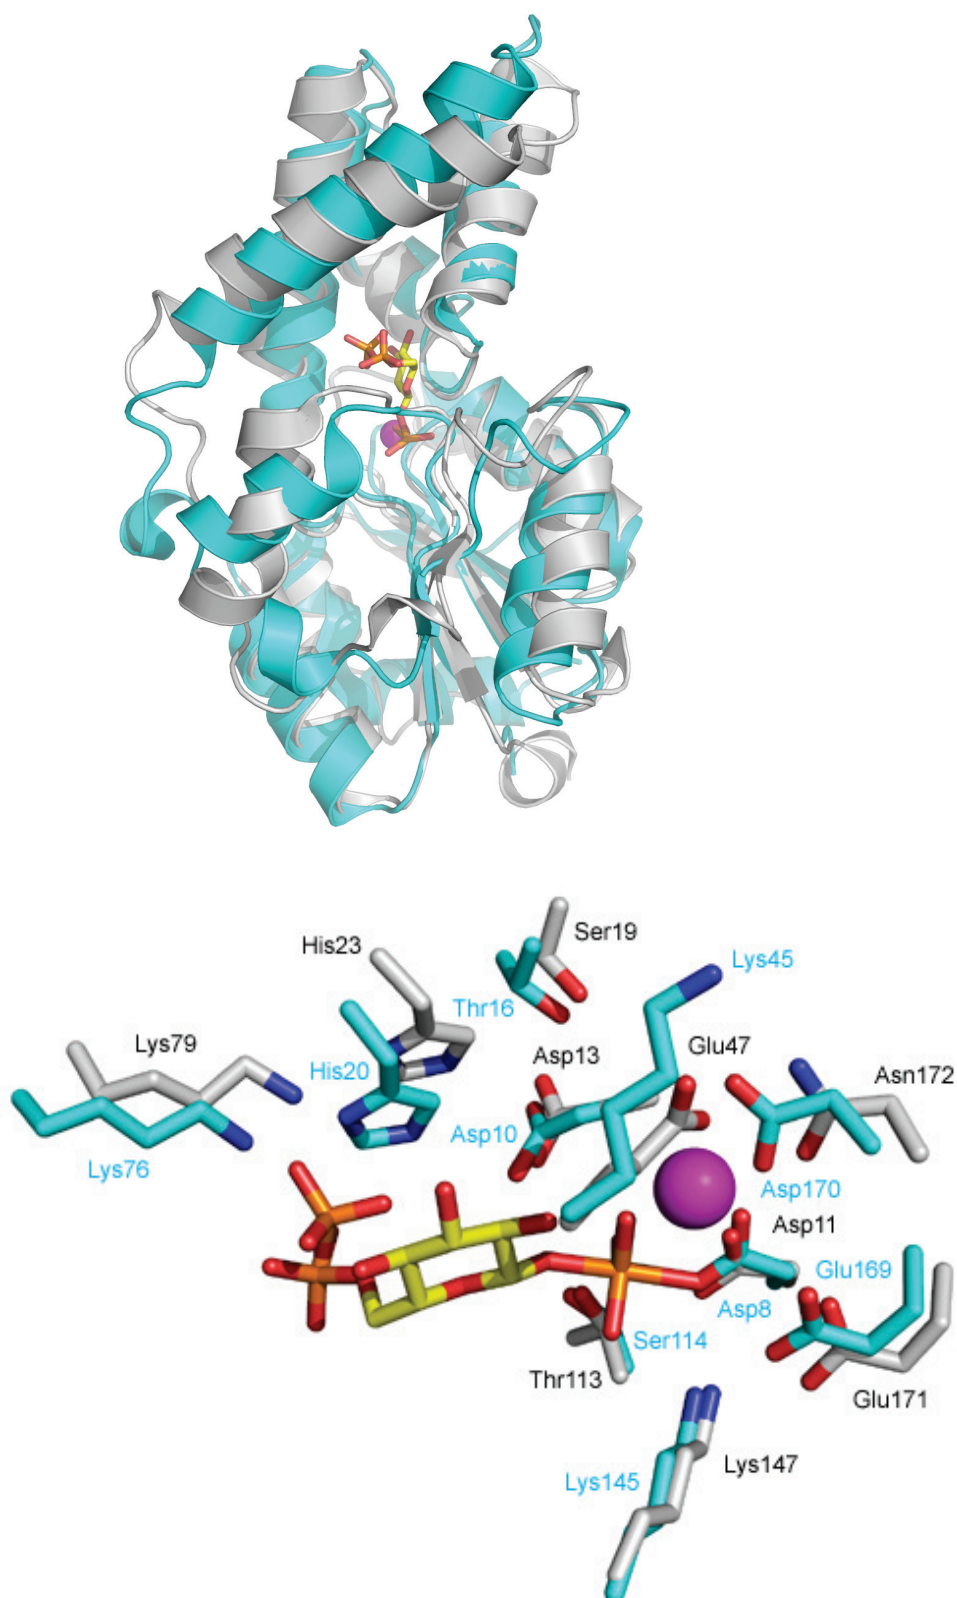

Figure S5. Multiple alignment of the amino acid sequences of BT2127 orthologues.

```

Ic1|12539
1
1c1|12539      . . . . .MRK. . . K. . . . .
gi|29347537    . . . . .MRK. . . K. . . . .
gi|253570881   . . . . .MRK. . . K. . . . .
gi|298383766   . . . . .MRK. . . K. . . . .
gi|153808810   . . . . .MKK. . . K. . . . .
gi|260174129   . . . . .MKK. . . K. . . . .
gi|237720029   . . . . .MKK. . . K. . . . .
gi|160885231   . . . . .MKK. . . K. . . . .
gi|294644124   . . . . .MKK. . . K. . . . .
gi|53715098     . . . . .MFQ. . . EAIAQYLKQNH
gi|255011243   . . . . .MFQ. . . EAITQYLQQNH
gi|60683056     . . . . .
gi|167764833   . . . . .MCNIKRLFILDSQLSVLYSPISNLFISIYQVFK. . . EAISRYLREHG
gi|329957690   . . . . .MFK. . . ESITRYLKKHG
gi|189463942   . . . . .MFQ. . . EAIARYLQSSG
gi|224536081   . . . . .MFQ. . . EAISRYLQSSG
gi|160889281   . . . . .MREIEKWLHNKCEENRSPILNSLFI. YPAFLNSQSPIYQVFE. . . NSIARYLEKHG
gi|317475556   . . . . .MFE. . . VAISRYLKKHG
gi|329960268   . . . . .MFE. . . ESITRYLEKHG
gi|218128650   . . . . .MTIFLFF. . . . .SKFEYRFCVILCPQQQI. . . . .MFE. . . VAISRYLKKHG
gi|319903121   . . . . .MFE. . . ESIAARYLEKHG
gi|212691210   . . . . .MFK. . . EAINNYLHAHG
gi|150006590   . . . . .MFK. . . EAINNYLHTHG
gi|198275658   . . . . .MFQ. . . QEINQYLTTHH
gi|333031526   . . . . .MYK. . . QQIINYLTKHK
gi|189459664   . . . . .MFQ. . . QAIENYLTTHH
gi|154493629   . . . . .MIQ. . . EAIAQYLQKQR
gi|218262603   . . . . .MIQ. . . EAIARYLQKQQ
gi|150006815   . . . . .MIQ. . . EAIIRYLKRR
gi|313205499   . . . . .MFT. . . AEIEKFIKSKN
gi|260885482   . . . . .MMNDYIQAIQNYLKDGH
gi|298372101   . . . . .MNG. . . . .ISKFSFKFY
gi|294674461   . . . . .

```

```

Ic1|12539
β1 →
1c1|12539      . . LKAVLFDMDGVLFN SMPYHSEAWHQVMKTHGLDLSREEAYMHEGRTGASTINI
gi|29347537    . . LKAVLFDMDGVLFN SMPYHSEAWHQVMKTHGLDLSREEAYMHEGRTGASTINI
gi|253570881   . . LKAVLFDMDGVLFN SMPYHSEAWHQVMKTHGLDLSREEAYMHEGRTGASTINI
gi|298383766   . . LKAVLFDMDGVLFN SMPYHSEAWHQVMKTHGLDLSREEAYMHEGRTGASTINI
gi|153808810   . . LKAVLFDMDGVLFN SMPYHSEAWHKVMKSHGLTLSREEAYMHEGRTGAATINI
gi|260174129   . . LKAVLFDMDGVLFD SMPYHSEAWHKVMKSHGLTLSREEAYMHEGRTGASTINI
gi|237720029   . . LKAVLFDMDGVLFD SMPYHSEAWHKVMKSHGLTLSCEEAYMHEGRTGASTINI
gi|160885231   . . LKAVLFDMDGVLFD SMPYHSEAWHTVMKSHGLTLSREEAYMHEGRTGASTINI
gi|294644124   . . LKAVLFDMDGVLFD SMPYHSEAWHTVMKSHGLTLSREEAYMHEGRTGASTINI
gi|53715098     . . QLKSVLFDMDGVLFD SMPYHAEAWHKTMKAHGLNLSREEAYMHEGRTGAGTINI
gi|255011243   . . . . .MLFDMDGVLFD SMPYHAEAWHKTMKAHGLNLSREEAYMHEGRTGAGTINI
gi|60683056     . . . . .MLFDMDGVLFD SMPYHAEAWHKTMKAHGLNLSREEAYMHEGRTGAGTINI
gi|167764833   . . RLKAVLFDMDGVLFN SMPYHADAWHTVME RHGLHLSREEAYMHEGRTGAATINI
gi|329957690   . . RLKAVLFDMDGVLFN SMPYHADAWHKVME RHGLHLSREEAYMHEGRTGAATINL
gi|189463942   . . QLKSVLFDMDGVLFN SMPYHADAWHKVME RHDLHLSREEAYLHEGRTGAATINI
gi|224536081   . . QLKSVLFDMDGVLFN SMPYHADAWHKVME RHGLHLSREEAYLHEGRTGAATINI
gi|160889281   . . QLKAVLFDMDGVLFN SMPYHADAWHKVME RHGLHLSREEAYMHEGRTGASTINI
gi|317475556   . . RLKAVLFDMDGVLFN SMPYHADAWHKVME RRGLHLSREEAYMHEGRTGAATINI
gi|329960268   . . QLKAVLFDMDGVLFN SMPYHADAWHTVME RHGLHLSREEAYMHEGRTGAATINI
gi|218128650   . . RLKAVLFDMDGVLFN SMPYHADAWHKVME RRGLHLSREEAYMHEGRTGAATINI
gi|319903121   . . RLKAVLFDMDGVLFN SMPYHADAWHKVME HHGLHLSREEAYMHEGRTGAATINI
gi|212691210   . . DLKAVLFDMDGVLFD SMPYHAEAWHKIMKRFEGFLSREEAYMHEGRTGASTINI
gi|150006590   . . DLKAVLFDMDGVLFD SMPYHAEAWHKIMKRFEGFLSREEAYMHEGRTGASTINI
gi|198275658   . . NLKAVLFDMDGVLFD SMPYHAEAWHKIMKRFEGFLSREEAYMHEGRTGASTINI
gi|333031526   . . KLKAVLFDMDGVLFD SMPYHAEAWHKVME RHNLDMNKKEEYVMEGRTGRGTINL
gi|189459664   . . NLKAVLFDMDGVLFD SMPYHAEAWHKVME RHNLDMNKKEEYVMEGRTGASTINI
gi|154493629   . . SPKAVLFDMDGVLFD SMPYHAEAWHKVME RHNLDMNKKEEYVMEGRTGASTINI
gi|218262603   . . SPKAVLFDMDGVLFD SMPYHAEAWHKVME RHNLDMNKKEEYVMEGRTGASTINI
gi|150006815   . . SPKAVLFDMDGVLFD SMPYHAEAWHKVME RHNLDMNKKEEYVMEGRTGASTINI
gi|313205499   . . KPKAVLFDMDGVLFD SMPYHAEAWHKVME RHNLDMNKKEEYVMEGRTGASTINI
gi|260885482   . . APKAVLFDMDGVLFD SMPYHAEAWHKVME RHNLDMNKKEEYVMEGRTGASTINI
gi|298372101   . . KNIKAVLFDMDGVLFD SMPYHAEAWHKVME RHNLDMNKKEEYVMEGRTGASTINI
gi|294674461   . . MIKAVLFDMDGVLFD SMPYHAEAWHKVME RHNLDMNKKEEYVMEGRTGASTINI

```

Figure S5 Continued

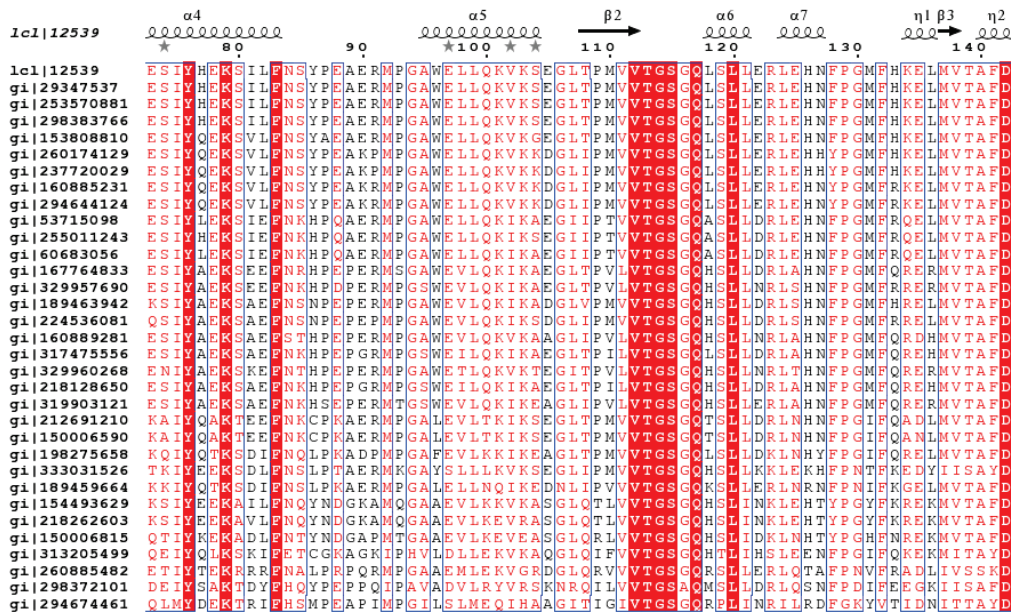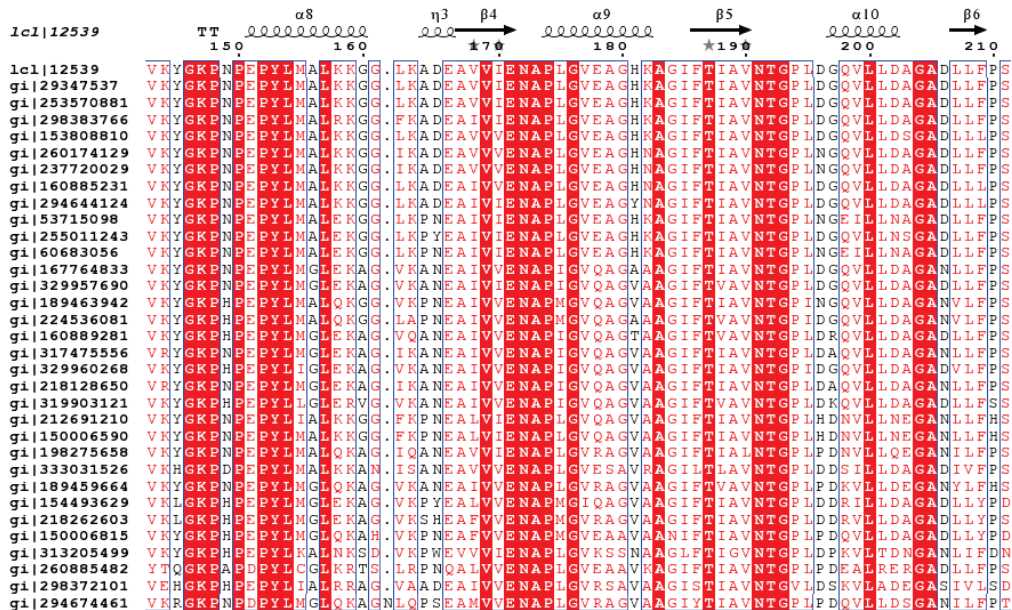



Figure S5 Continued

```

                                all
ic1|12539      000000000000
                                220
ic1|12539      MQTLCDSDTITML.....
gi|29347537    MQTLCDSDTITML.....
gi|253570881   MQALCDSDTITML.....
gi|298383766   MQALCDSDTITML.....
gi|153808810   MQALCEAWDGL...DL.....
gi|260174129   MQALNDTWDMTENDI.....
gi|237720029   MQALNDTWDMTENDI.....
gi|160885231   MQALSDHWDTLFEKNT.....
gi|294644124   MQALSDHWDTLFEKNT.....
gi|53715098    MQALCESWEKLVRLH.....
gi|255011243   MQALCESWEALARFLHQPPLKTTIADN
gi|60683056    MQALCESWEKLVRLH.....
gi|167764833   MQAFCDNWEAVRDALA..SEE.....
gi|329957690   MQAFCDNWEIVRKELA..SQE.....
gi|189463942   MQAFCDNWEKLEHAFG..QINRTL...
gi|224536081   MQDFCDNWNENLRKAFE.....
gi|160889281   MQALCDDWERLQTALD..ASNSLRHKD
gi|317475556   MQALNENWEKQQALI..P.....
gi|329960268   MQALNANWESLHTALN..LTELP...
gi|218128650   MQALNENWEKQQALI..P.....
gi|319903121   MQDFCDNWEKLGKLN..RLHTPLPY.
gi|212691210   MPDFNKNWETLQSALKQD.....
gi|150006590   MPDFNKNWETLQSALKQD.....
gi|198275658   MSAFNENWETCRQSLQEVSL.....
gi|333031526   MQALADNDLQNDILYCSKNSGKKK
gi|189459664   MSDFSKNWKDFYQAIK.....
gi|154493629   MTA LAKDWDNLMNAIK..IS.....
gi|218262603   MTA LAEDWNNLMNAIK..VS.....
gi|150006815   MENLAKDWKQIIFELAK..STRLNEYSK
gi|313205499   MKELYDNWEAIAS.....
gi|260885482   MQALATHWEEIRAAIAACAPTK....
gi|298372101   MQELKQIMQIILT.....
gi|294674461   MQALS DSWKDLPPVKGQVPVI.....

```



Figure S6. Interactions at the BT2127 cap domain (yellow)-catalytic domain (gray) interface.

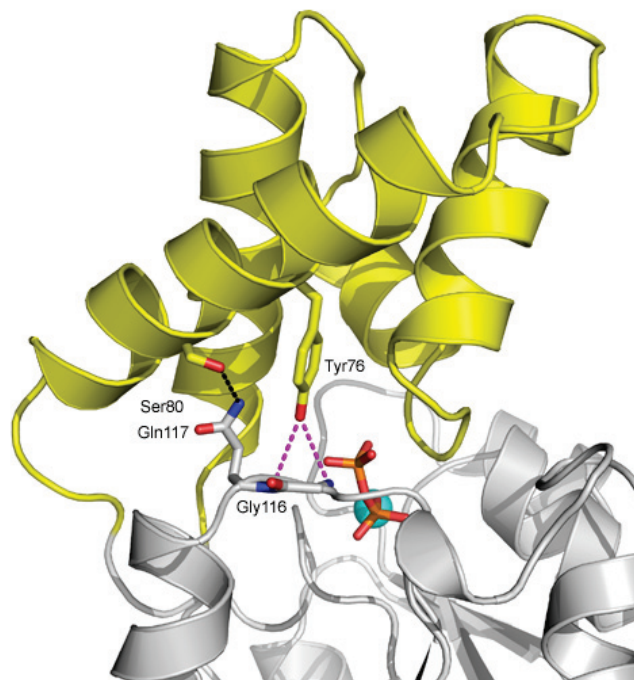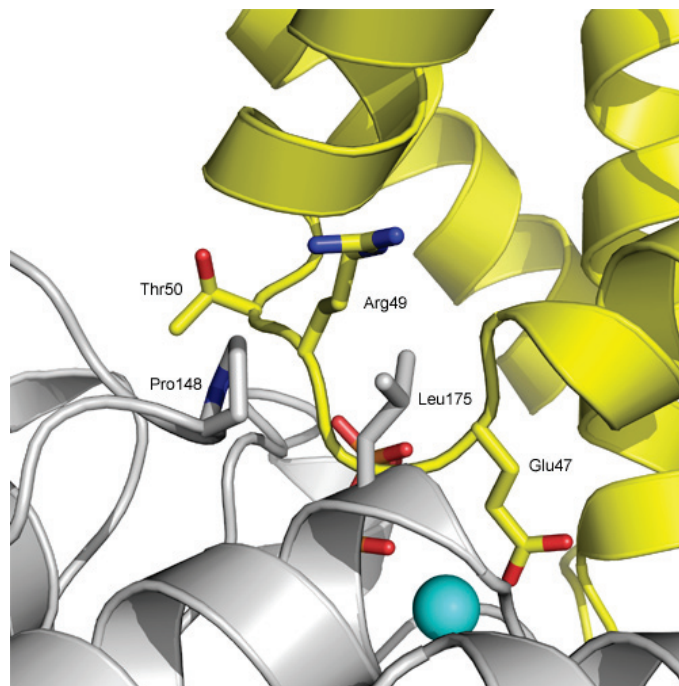

Figure S7. Alignment of the BT2127 sequence with the sequences of more distantly related homologues that do not conserve the marker residue Asn172.

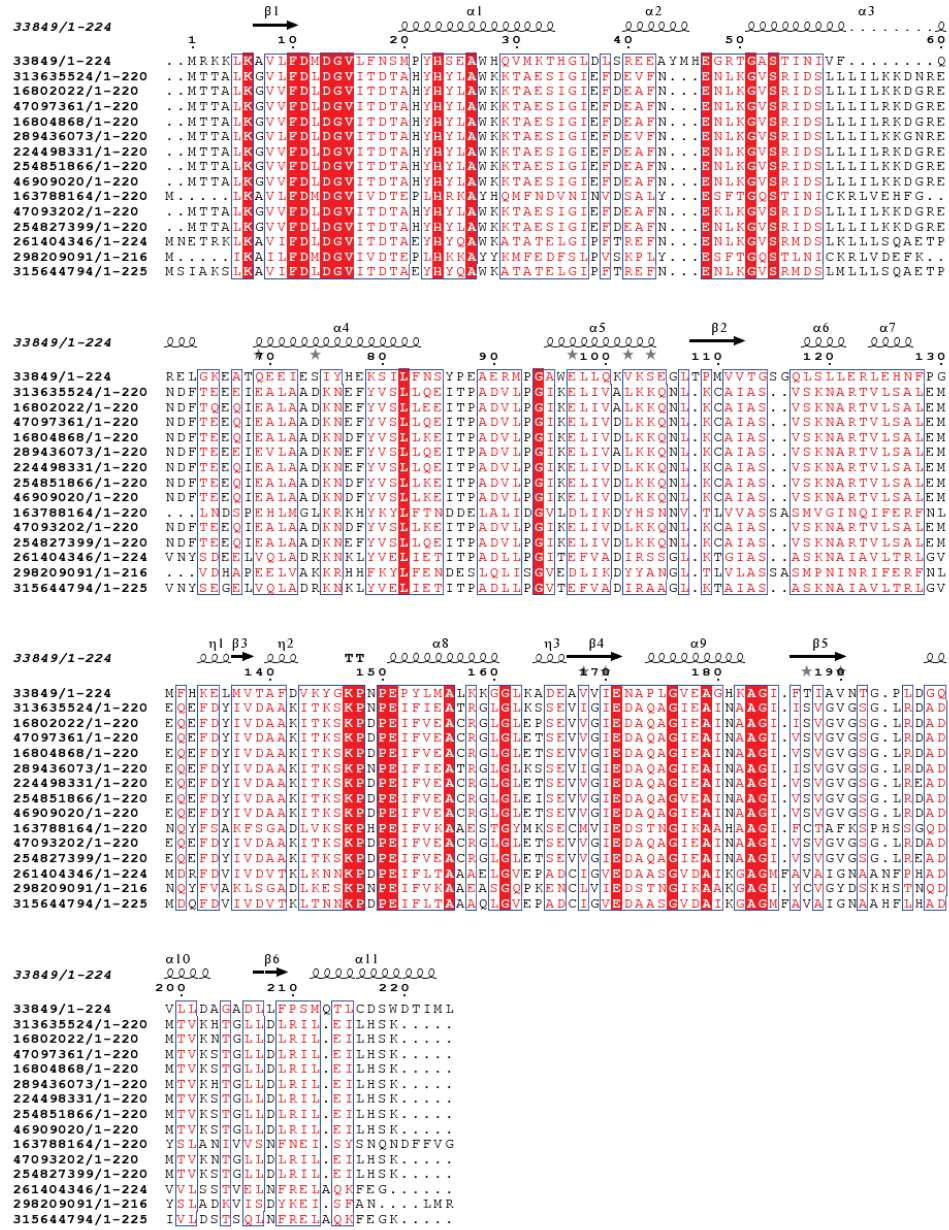

**Figure S8.** Left: The hydrogen bond network (black dashed line) of *L. lactis*  $\beta$ -PGM with  $Mg^{2+}$  (cyan sphere) and  $\beta$ -glucose 1,6-(bis)phosphate as ball and stick (phosphorus orange). Center: The placement of Asp10 in the cap-open conformation (arrows indicate the direction of movement of the Thr16 backbone and Asp10 side chain in going to the cap-closed conformation). Right: The placement of Asp10 in the cap-closed conformation.

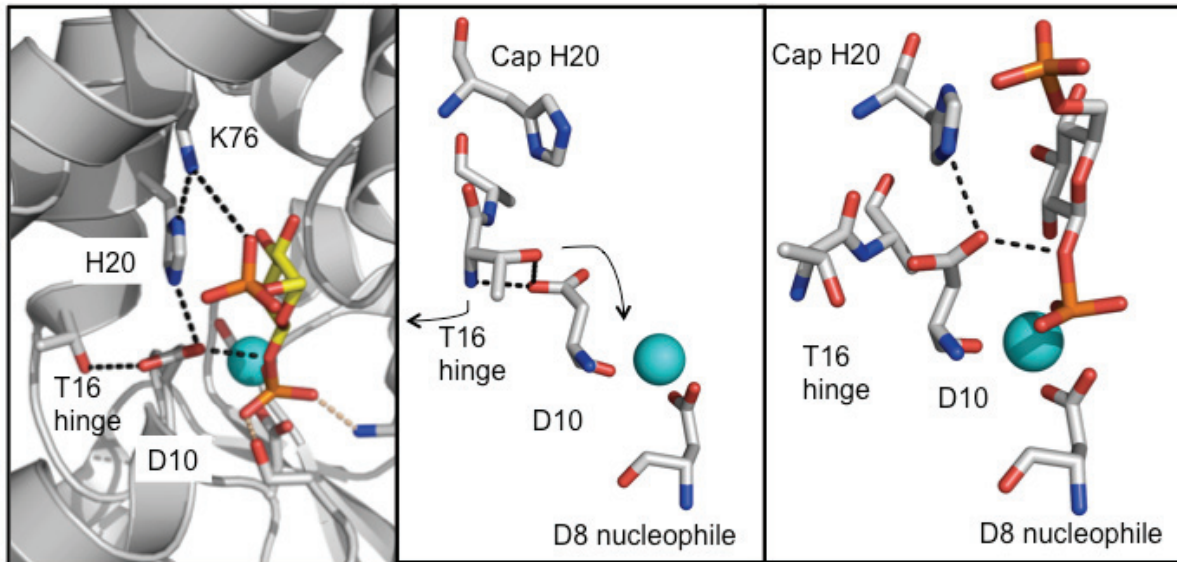

Figure S9. Multiple sequence alignment of the amino acid sequences of TON0002 orthologues.

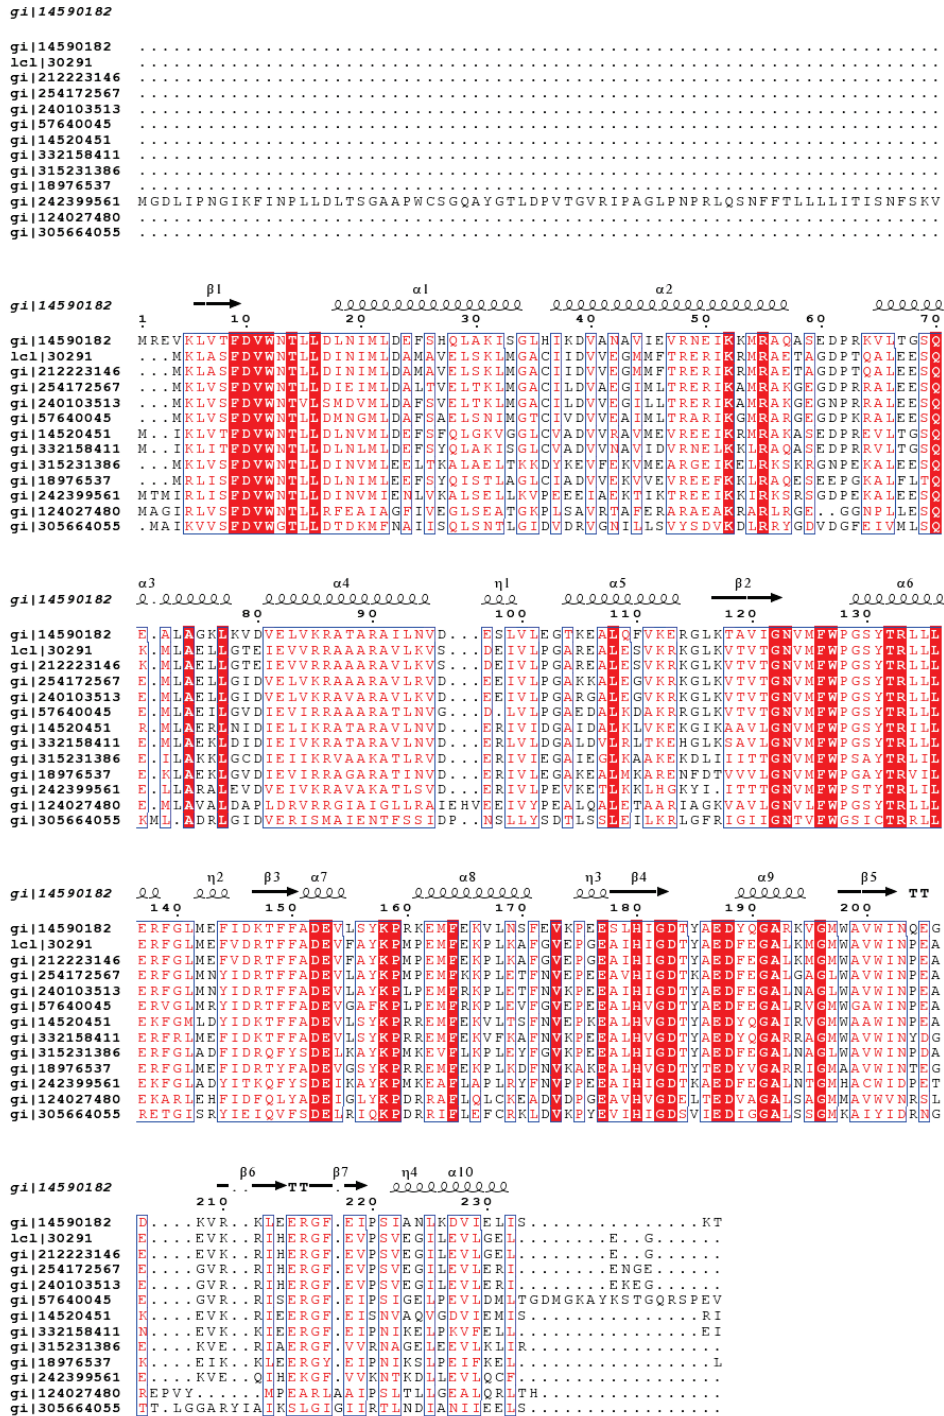

Supplement: NIHMS326806-supplement-1_si_001.pdf [file NIHMS326806-supplement-1_si_001.pdf]
